# Supplementary material for: Influence of Energy Deficiency on the Molecular Processes of Substantia Nigra Pars Compacta Cell for Understanding Parkinsonian Neurodegeneration: A Comprehensive Biophysical Computational Model
Source: bioRxiv or medRxiv preprint supplement (doi:10.1101/2020.02.18.950337), 2020-02-19
Supplement: Supplementary file [file media-1.pdf]

**Table-1:** Published dopaminergic neuronal models.

| S.No. | Model                                                                                      | Ion channels                                                                                                                                                                 | Pumps and exchangers (Ionic balance)                                    | Synaptic currents                                                | Reference(s)                                                                  |
|-------|--------------------------------------------------------------------------------------------|------------------------------------------------------------------------------------------------------------------------------------------------------------------------------|-------------------------------------------------------------------------|------------------------------------------------------------------|-------------------------------------------------------------------------------|
| 1.    | Two-compartment – soma and dendrite                                                        | Soma: $I_{K,DR}$ ,<br>$I_{Na}$<br>Dendrite: $I_L$                                                                                                                            | Dendrite:<br>$I_{NaKP}$<br>(sodium)                                     | Dendrite:<br>$I_{NMDA}$                                          | (Li et al., 1996)                                                             |
| 2.    | Single-compartment soma with calcium buffering (CBP)                                       | Soma: $I_{Ca,T}$ ,<br>$I_{Ca,L}$ , $I_{Ca,N}$ ,<br>$I_{Ca,HVA}$ ,<br>$I_{K,Ca}$ , $I_{K,DR}$ ,<br>$I_{K,A}$ , $I_H$ , $I_B$                                                  | Soma: $I_{NaKP}$ ,<br>$I_{CaP}$ , $I_{NaCaX}$<br>(calcium)              | -                                                                | (Amini et al., 1999)                                                          |
| 3.    | Three compartments – Soma, proximal and distal dendrites                                   | $I_{K,DR}$ , $I_L$                                                                                                                                                           | $I_{NaKP}$<br>(sodium in all)                                           | Distal dendrite:<br>$I_{NMDA}$ ,<br>$I_{AMPA}$ ,<br>$I_{GABAA}$  | (Canavier, 1999)                                                              |
| 4.    | (Amini et al., 1999) model with calcium diffusion (also abstract version)                  | Soma: $I_{Ca}$ ,<br>$I_{K,Ca}$ , $I_K$ , $I_L$                                                                                                                               | Soma:<br>(calcium)                                                      | -                                                                | (Medvedev et al., 2003; Medvedev and Kopell, 2001; Wilson and Callaway, 2000) |
| 5.    | Two (Canavier, 1999) models coupled at distal dendrites                                    | $I_{Na}$ , $I_{K,DR}$ ,<br>$I_L$ , $I_{K,A}$                                                                                                                                 | $I_{NaKP}$                                                              | Distal dendrite:<br>$I_{NMDA}$                                   | (Komendantov and Canavier, 2002)                                              |
| 6.    | Soma with four identical branched dendrites with a single proximal and two distal branches | Soma: $I_{Na}$ ,<br>$I_{K,A}$ , $I_{K,DR}$ ,<br>$I_L$ , $I_{K,Ca}$ ,<br>$I_{Ca,T}$ , $I_{Ca,L}$ ,<br>$I_{Ca,N}$<br>Dendrite:<br>$I_{Na}$ , $I_{K,A}$ ,<br>$I_{K,DR}$ , $I_L$ | Soma: $I_{NaKP}$ ,<br>$I_{CaP}$<br>(calcium)<br>Dendrite:<br>$I_{NaKP}$ | Soma:<br>$I_{GABAA}$<br>Dendrite:<br>$I_{NMDA}$ ,<br>$I_{GABAA}$ | (Komendantov et al., 2004)                                                    |
| 7.    | Modified (Komendantov                                                                      | Soma: $I_{Na}$ ,<br>$I_{K,A}$ , $I_{K,DR}$ ,                                                                                                                                 | Soma: $I_{NaKP}$ ,<br>$I_{CaP}$                                         | Soma:<br>$I_{GABAA}$                                             | (Canavier and Landry, 2006)                                                   |

|     |                                                                                                                                        |                                                                                                                      |                                               |                                           |                                            |
|-----|----------------------------------------------------------------------------------------------------------------------------------------|----------------------------------------------------------------------------------------------------------------------|-----------------------------------------------|-------------------------------------------|--------------------------------------------|
|     | et al., 2004) model with $I_{AMPA}$ synaptic current in dendrite                                                                       | $I_{K,Ca}, I_L, I_{Ca,T}, I_{Ca,L}, I_{Ca,N}$<br>Dendrite: $I_{Na}, I_{K,A}, I_{K,DR}, I_L$                          | (calcium)<br>Dendrite: $I_{NaKP}$<br>(sodium) | Dendrite: $I_{NMDA}, I_{AMPA}, I_{GABAA}$ |                                            |
| 8.  | Modified (Wilson and Callaway, 2000) model with $I_{AMPA}$ and $I_{NMDA}$ synaptic currents along with spiking generating ion channels | Soma: $I_{Ca}, I_{K,Ca}, I_K, I_L, I_{Na}, I_{K,DR}$                                                                 | Soma: (calcium)                               | Soma: $I_{NMDA}, I_{AMPA}$                | (Kuznetsov et al., 2006)                   |
| 9.  | Single-compartment soma                                                                                                                | Soma: $I_{Ca,L}, I_{Ca,B}, I_{K,ERG}, I_{K,Ca}, I_H, I_L$                                                            | Soma: $I_{CaP}$<br>(calcium)                  | -                                         | (Canavier et al., 2007)                    |
| 10. | Modified (Komendantov et al., 2004) model with pacemaking mechanism throughout soma and dendrites                                      | Soma: $I_{Na}, I_A, I_{K,DR}, I_L, I_{K,Ca}, I_{Ca,L}$<br>Dendrite: $I_{Na}, I_A, I_{K,DR}, I_L, I_{K,Ca}, I_{Ca,L}$ | Soma: (calcium)                               | -                                         | (Kuznetsova et al., 2010; Yu et al., 2014) |
| 11. | Single-compartment soma                                                                                                                | Soma: $I_{Ca,L}, I_{Na}, I_{K,DR}, I_{K,Ca}, I_L$                                                                    | Soma: $I_{CaP}$<br>(calcium)                  | -                                         | (Drion et al., 2011)                       |
| 12. | Single-compartment soma which is combines conductance mechanisms from (Amini et al., 1999) and (Kuznetsov et al., 2006)                | Soma: $I_{Ca,L}, I_{Na}, I_{K,DR}, I_{K,Ca}, I_L, I_K$                                                               | Soma: $I_{CaP}$<br>(calcium)                  | Soma: $I_{NMDA}, I_{GABAA}$               | (Oster and Gutkin, 2011)                   |
| 13. | Single-compartment                                                                                                                     | Soma: $I_{Ca,L}, I_{Na}, I_{Na,HCN},$                                                                                | Soma: $I_{NaKP}, I_{CaP}, I_{NaCaX}$          | -                                         | (Francis et al., 2013)                     |

|     |                                                                                                                                  |                                                                           |                                                     |                                       |                                                   |
|-----|----------------------------------------------------------------------------------------------------------------------------------|---------------------------------------------------------------------------|-----------------------------------------------------|---------------------------------------|---------------------------------------------------|
|     | soma with calcium buffering (CBP)                                                                                                | $I_{L,Na}, I_{K,DR}, I_{L,IR}, I_{K,Ca}$                                  | (calcium, sodium, potassium, calbindin, calmodulin) |                                       |                                                   |
| 14. | Modified (Kuznetsov et al., 2006) model with altered NMDA and $I_{K,ERG}$ along with full morphology of dendrite (reduced model) | Soma: $I_{Ca,L}, I_{Na}, I_{K,DR}, I_{K,Ca}, I_L, I_{K,ERG}$              | Soma: $I_{CaP}$ (calcium)                           | Soma: $I_{NMDA}, I_{AMPA}$            | (Ha and Kuznetsov, 2013; Zakharov et al., 2016)   |
| 15. | Single-compartment soma                                                                                                          | Soma: $I_{Na}, I_{K,DR}, I_L$                                             | -                                                   | Soma: $I_{NMDA}, I_{AMPA}$            | (Qian et al., 2014)                               |
| 15. | Single-compartment soma with full morphology of dendrite                                                                         | Soma: $I_{Ca}, I_{Na}, I_{K,DR}, I_{K,Ca}, I_{L,Ca}, I_{K,ERG}, I_H, I_L$ | Soma: $I_{CaP}$ (calcium)                           | -                                     | (Yu and Canavier, 2015)                           |
| 16. | Simple (spiking) dopaminergic neuronal model                                                                                     | Izhikevich (point neuron) – two variable neuronal model                   | -                                                   | -                                     | (Cullen and Wong-Lin, 2015; Muddapu et al., 2019) |
| 17. | Modified (Ha and Kuznetsov, 2013)                                                                                                | Soma: $I_{Ca}, I_{Na}, I_{Na,S}, I_{K,DR}, I_{K,Ca}, I_L, I_K, I_H$       | Soma: $I_{CaP}$ (calcium)                           | Soma: $I_{NMDA}, I_{AMPA}, I_{GABAA}$ | (Morozova et al., 2016b, 2016a)                   |
| 18. | Single-compartment soma with calcium buffering (CBP) along $I_{K,ATP}$ mediated bursting                                         | Soma: $I_{Ca,L}, I_{Na}, I_{K,DR}, I_{K,ATP}, I_{L,Ca}, I_L$              | Soma: $I_{CaP}$ (calcium)                           | Soma: $I_{NMDA}$                      | (Knowlton et al., 2018)                           |

|     |                                             |                                                                                                |                              |   |                              |
|-----|---------------------------------------------|------------------------------------------------------------------------------------------------|------------------------------|---|------------------------------|
| 19. | Modified<br>(Kuznetsova et al., 2010) model | $I_{Ca,L}, I_{Ca,T}, I_{Na}, I_{Na,HCN}, I_{K,DR}, I_{K,B}, I_{K,Ca}, I_{K,A}, I_{K,ERG}, I_L$ | Soma: $I_{CaP}$<br>(calcium) | - | (Rumbell and Kozloski, 2019) |
|-----|---------------------------------------------|------------------------------------------------------------------------------------------------|------------------------------|---|------------------------------|

$I_{Ca,T}$  – T-type calcium current;  $I_{Ca,L}$  – L-type calcium current;  $I_{Ca,N}$  – N-type calcium current;  $I_{Ca,HVA}$  – residual high-voltage activated calcium current;  $I_{Ca}$  – calcium current;  $I_{K,Ca}$  – calcium-activated (small conductance) potassium current;  $I_{K,DR}$  – delayed rectifier potassium current;  $I_{K,A}$  – transient outward (4-aminopyridine-sensitive) potassium current;  $I_H$  – hyperpolarization-activated cation current;  $I_B$  – background current (sodium, potassium, calcium);  $I_{NaKP}$  – sodium-potassium pump;  $I_{CaP}$  – calcium pump;  $I_{NaCaX}$  – sodium-calcium exchanger;  $I_L$  – leaky current;  $I_{Na}$  – fast spiking (tetrodotoxin-sensitive) sodium current;  $I_{NMDA}$  – N-methyl-D-aspartic acid (NMDA) current;  $I_{AMPA}$  – alpha-amino-3-hydroxy-5-methyl-4-isoxazolepropionic acid (AMPA) current;  $I_{GABAA}$  – gamma-aminobutyric acid A-class (GABAA) current;  $I_{K,ERG}$  – ERG (ether-a-go-go-related gene) potassium current;  $I_{Ca,B}$  – background calcium leak current;  $I_{L,Ca}$  – leaky calcium current; CBP – calcium-binding proteins;  $I_{L,Na}$  – leaky sodium current;  $I_{K,IR}$  – inward rectifying potassium current;  $I_{Na,HCN}$  – hyperpolarization-activated cyclic nucleotide (HCN) sodium current;  $I_{Na,S}$  – subthreshold sodium current;  $I_K$  – intrinsic potassium current;  $I_{K,ATP}$  – ATP-sensitive potassium current;  $I_{K,B}$  – large conductance potassium current;

## References

- Amini, B., Clark, J. W., and Canavier, C. C. (1999). Calcium dynamics underlying pacemaker-like and burst firing oscillations in midbrain dopaminergic neurons: a computational study. *J. Neurophysiol.* 82, 2249–61. Available at: <http://www.ncbi.nlm.nih.gov/pubmed/10561403>.
- Canavier, C. C. (1999). Sodium dynamics underlying burst firing and putative mechanisms for the regulation of the firing pattern in midbrain dopamine neurons: A computational approach. *J. Comput. Neurosci.* 6, 49–69. doi:10.1023/A:1008809000182.
- Canavier, C. C., and Landry, R. S. (2006). An increase in AMPA and a decrease in SK conductance increase burst firing by different mechanisms in a model of a dopamine neuron in vivo. *J. Neurophysiol.* 96, 2549–2563. doi:10.1152/jn.00704.2006.
- Canavier, C. C., Oprisan, S. a, Callaway, J. C., Ji, H., and Shepard, P. D. (2007). Computational model predicts a role for ERG current in repolarizing plateau potentials in dopamine neurons: implications for modulation of neuronal activity. *J. Neurophysiol.* 98, 3006–3022. doi:10.1152/jn.00422.2007.
- Cullen, M., and Wong-Lin, K. (2015). Integrated dopaminergic neuronal model with reduced intracellular processes and inhibitory autoreceptors. *IET Syst. Biol.* 9, 245–258. doi:10.1049/iet-syb.2015.0018.
- Drion, G., Massotte, L., Sepulchre, R., and Seutin, V. (2011). How modeling can reconcile apparently discrepant experimental results: The case of pacemaking in dopaminergic

- neurons. *PLoS Comput. Biol.* 7. doi:10.1371/journal.pcbi.1002050.
- Francis, F., García, M. R., and Middleton, R. H. (2013). A single compartment model of pacemaking in dissociated substantia nigra neurons: stability and energy analysis. *J. Comput. Neurosci.* 35, 295–316. doi:10.1007/s10827-013-0453-9.
- Ha, J., and Kuznetsov, A. (2013). Interaction of NMDA Receptor and Pacemaking Mechanisms in the Midbrain Dopaminergic Neuron. *PLoS One* 8, e69984. doi:10.1371/journal.pone.0069984.
- Knowlton, C., Kutterer, S., Roeper, J., and Canavier, C. C. (2018). Calcium dynamics control K-ATP channel-mediated bursting in substantia nigra dopamine neurons: a combined experimental and modeling study. *J. Neurophysiol.* 119, 84–95. doi:10.1152/jn.00351.2017.
- Komendantov, A. O., and Canavier, C. C. (2002). Electrical coupling between model midbrain dopamine neurons: effects on firing pattern and synchrony. *J. Neurophysiol.* 87, 1526–1541.
- Komendantov, A. O., Komendantova, O. G., Johnson, S. W., and Canavier, C. C. (2004). A modeling study suggests complementary roles for GABAA and NMDA receptors and the SK channel in regulating the firing pattern in midbrain dopamine neurons. *J. Neurophysiol.* 91, 346–357. doi:10.1152/jn.00062.2003.
- Kuznetsov, A. S., Kopell, N. J., and Wilson, C. J. (2006). Transient high-frequency firing in a coupled-oscillator model of the mesencephalic dopaminergic neuron. *J. Neurophysiol.* 95, 932–947. doi:10.1152/jn.00691.2004.
- Kuznetsova, A. Y., Huertas, M. A., Kuznetsov, A. S., Paladini, C. A., and Canavier, C. C. (2010). Regulation of firing frequency in a computational model of a midbrain dopaminergic neuron. *J. Comput. Neurosci.* 28, 389–403. doi:10.1007/s10827-010-0222-y.
- Li, Y., Bertram, R., and Rinzel, J. (1996). Modeling N-methyl-D-aspartate-induced bursting in dopamine neurons. *Neuroscience* 71, 397–410.
- Medvedev, G. S., and Kopell, N. (2001). Synchronization and Transient Dynamics in the chains of Electrically Coupled Fitzhugh-Nagumo oscillators. *Society* 61, 1762–1801.
- Medvedev, G. S., Wilson, C. J., Callaway, J. C., and Kopell, N. (2003). Dendritic synchrony and transient dynamics in a coupled oscillator model of the dopaminergic neuron. *J. Comput. Neurosci.* 15, 53–69. doi:10.1023/A:1024422802673.
- Morozova, E. O., Myroshnychenko, M., Zakharov, D., di Volo, M., Gutkin, B., Lapish, C. C., et al. (2016a). Contribution of synchronized GABAergic neurons to dopaminergic neuron firing and bursting. *J. Neurophysiol.* 116, 1900–1923. doi:10.1152/jn.00232.2016.
- Morozova, E. O., Zakharov, D., Gutkin, B. S., Lapish, C. C., and Kuznetsov, A. (2016b). Dopamine Neurons Change the Type of Excitability in Response to Stimuli. *PLoS Comput. Biol.* 12, e1005233. doi:10.1371/journal.pcbi.1005233.
- Muddapu, V. R., Mandali, A., Chakravarthy, V. S., and Ramaswamy, S. (2019). A Computational Model of Loss of Dopaminergic Cells in Parkinson's Disease Due to Glutamate-Induced Excitotoxicity. *Front. Neural Circuits* 13, 11. doi:10.3389/fncir.2019.00011.

- Oster, A. M., and Gutkin, B. S. (2011). A reduced model of DA neuronal dynamics that displays quiescence, tonic firing and bursting. *J. Physiol. Paris* 105, 53–58. doi:10.1016/j.jphysparis.2011.07.012.
- Qian, K., Yu, N., Tucker, K. R., Levitan, E. S., and Canavier, C. C. (2014). Mathematical analysis of depolarization block mediated by slow inactivation of fast sodium channels in midbrain dopamine neurons. *J. Neurophysiol.* 112, 2779–2790. doi:10.1152/jn.00578.2014.
- Rumbell, T., and Kozloski, J. (2019). Dimensions of control for subthreshold oscillations and spontaneous firing in dopamine neurons. *PLOS Comput. Biol.* 15, e1007375. doi:10.1371/journal.pcbi.1007375.
- Wilson, C. J., and Callaway, J. C. (2000). Coupled oscillator model of the dopaminergic neuron of the substantia nigra. *J. Neurophysiol.* 83, 3084–3100.
- Yu, N., and Canavier, C. C. (2015). A Mathematical Model of a Midbrain Dopamine Neuron Identifies Two Slow Variables Likely Responsible for Bursts Evoked by SK Channel Antagonists and Terminated by Depolarization Block. *J. Math. Neurosci.* 5, 5. doi:10.1186/s13408-015-0017-6.
- Yu, N., Tucker, K. R., Levitan, E. S., Shepard, P. D., and Canavier, C. C. (2014). “Implications of Cellular Models of Dopamine Neurons for Schizophrenia,” in *Progress in molecular biology and translational science*, 53–82. doi:10.1016/B978-0-12-397897-4.00011-5.
- Zakharov, D., Lapish, C., Gutkin, B., and Kuznetsov, A. (2016). Synergy of AMPA and NMDA Receptor Currents in Dopaminergic Neurons: A Modeling Study. *Front. Comput. Neurosci.* 10, 1–11. doi:10.3389/fncom.2016.00048.
