# Supplementary material for: Influence of Energy Deficiency on the Molecular Processes of Substantia Nigra Pars Compacta Cell for Understanding Parkinsonian Neurodegeneration: A Comprehensive Biophysical Computational Model
Source: bioRxiv or medRxiv preprint supplement (doi:10.1101/2020.02.18.950337), 2020-02-19
Supplement: Supplementary file [file media-2.pdf]

**Table-1:** Published dopaminergic terminal models.

| S.No. | Model                                                                           | Metabolite balance (units)                                                 | Autoreceptors                                      | Reference(s)                           |
|-------|---------------------------------------------------------------------------------|----------------------------------------------------------------------------|----------------------------------------------------|----------------------------------------|
| 1.    | Two-compartment – cytoplasmic and extracellular                                 | $DA_c, DA_v, DA_e, LDOPA, I1, I2$<br>(nmol/g, min)                         | DA synthesis                                       | (Porenta and Riederer, 1982)           |
| 2.    | Two-compartment – cytoplasmic and extracellular                                 | $DA_i, DA_e$<br>( $\mu$ g/g, min)                                          | DA firing                                          | (King et al., 1984)                    |
| 3.    | Three-compartment – cytoplasmic, vesicular and extracellular                    | $DA_c, DA_v, DA_e, DA_a, DA_g, 3MT, LDOPA, DOPAC, HVA$<br>(mM, ms)         | -                                                  | (Justice et al., 1988)                 |
| 4.    | Biochemical systems theory model                                                | DA homeostasis<br>(relative units)                                         | -                                                  | (Qi et al., 2008a, 2008b)              |
| 5.    | Three-compartment – cytoplasmic, vesicular and extracellular                    | $DA_c, DA_v, DA_e, TYR, LDOPA, BH_2, BH_4, HVA, TYRPOOL$<br>( $\mu$ M, hr) | DA synthesis                                       | (Best et al., 2009; Reed et al., 2009) |
| 6.    | Three-compartment – cytoplasmic, vesicular and extracellular                    | $DA_c, DA_v, DA_e$<br>(mM, ms)                                             | DA synthesis, DA release                           | (Tello-Bravo, 2012)                    |
| 7.    | Modified (Best et al., 2009) model with DA and 5HT cell bodies and 5HT terminal | DA terminal: $DA_c, DA_v, DA_e, TYR, LDOPA, BH_2, BH_4, HVA, TYRPOOL$      | DA synthesis, DA firing, 5HT synthesis, 5HT firing | (Reed et al., 2012)                    |

|     |                                                                |                                                                                                                                                                                                                                    |                         |                                                    |
|-----|----------------------------------------------------------------|------------------------------------------------------------------------------------------------------------------------------------------------------------------------------------------------------------------------------------|-------------------------|----------------------------------------------------|
|     |                                                                | 5HT terminal:<br><i>5HT<sub>c</sub></i> , <i>5HT<sub>v</sub></i> , <i>5HT<sub>e</sub></i> ,<br><i>TRYP</i> , <i>5HTP</i> ,<br><i>BH<sub>2</sub></i> , <i>BH<sub>4</sub></i> , <i>HIA</i> ,<br><i>TRPPOOL</i><br><br>( $\mu$ M, hr) |                         |                                                    |
| 8.  | DA neurotransmission model                                     | Volume transmission<br><br>( $\mu$ M, sec)                                                                                                                                                                                         | DA firing, DA release   | (Dreyer et al., 2010; Dreyer and Hounsgaard, 2013) |
| 9.  | Systems Biology Markup Language model                          | Flux balance analysis<br><br>( $\mu$ M, hr)                                                                                                                                                                                        | -                       | (Büchel et al., 2013)                              |
| 10. | Modified (Best et al., 2009) model with spiking neuronal model | DA terminal: <i>DA<sub>c</sub></i> ,<br><i>DA<sub>v</sub></i> , <i>DA<sub>e</sub></i> , <i>TYR</i> ,<br><i>LDOPA</i> , <i>BH<sub>2</sub></i> ,<br><i>BH<sub>4</sub></i> , <i>HVA</i> ,<br><i>TYRPOOL</i><br><br>( $\mu$ M, hr)     | DA synthesis, DA firing | (Cullen and Wong-Lin, 2015)                        |

*DA* – dopamine; *5HT* – serotonin; *DA<sub>c</sub>* – cytoplasmic DA; *DA<sub>v</sub>* – vesicular DA; *DA<sub>e</sub>* – extracellular DA; *DA<sub>a</sub>* – inactive DA; *DA<sub>g</sub>* – glial DA; *TH* – tyrosine hydroxylase; *I1* – competitive TH inhibitor 1; *I2* – competitive TH inhibitor 2; *LDOPA* – 3,4-dihydroxyphenylalanine; *3MT* – 3-methoxytyramine; *DOPAC* – 3,4-dihydroxyphenylacetic acid; *HVA* – homovanillic acid; *TYR* – tyrosine; *BH<sub>2</sub>* – dihydrobiopterin; *BH<sub>4</sub>* – tetrahydrobiopterin; *TYRPOOL* – tyrosine pool; *5HT<sub>c</sub>* – cytoplasmic 5HT; *5HT<sub>v</sub>* – vesicular 5HT; *5HT<sub>e</sub>* – extracellular 5HT; *5HTP* – 5-hydroxytryptophan; *HIA* – 5-hydroxyindoleacetic acid; *TRYP* – tryptophan; *TRYPOOL* – tryptophan pool;  $\mu$ M – micromolar; mM – millimolar; ms – millisecond; hr – hour; *DA<sub>i</sub>* – intracellular DA; nmol – nanomole; g – gram; min – minute.

## References

Best, J. A., Nijhout, H. F., and Reed, M. C. (2009). Homeostatic mechanisms in dopamine synthesis and release: a mathematical model. *Theor. Biol. Med. Model.* 6, 21. doi:10.1186/1742-4682-6-21.

- Büchel, F., Saliger, S., Dräger, A., Hoffmann, S., Wrzodek, C., Zell, A., et al. (2013). Parkinson's disease: dopaminergic nerve cell model is consistent with experimental finding of increased extracellular transport of  $\alpha$ -synuclein. *BMC Neurosci.* 14, 136. doi:10.1186/1471-2202-14-136.
- Cullen, M., and Wong-Lin, K. (2015). Integrated dopaminergic neuronal model with reduced intracellular processes and inhibitory autoreceptors. *IET Syst. Biol.* 9, 245–258. doi:10.1049/iet-syb.2015.0018.
- Dreyer, J. K., Herrik, K. F., Berg, R. W., and Hounsgaard, J. D. (2010). Influence of phasic and tonic dopamine release on receptor activation. *J. Neurosci.* 30, 14273–14283. doi:10.1523/JNEUROSCI.1894-10.2010.
- Dreyer, J. K., and Hounsgaard, J. (2013). Mathematical model of dopamine autoreceptors and uptake inhibitors and their influence on tonic and phasic dopamine signaling. *J. Neurophysiol.* 109, 171–182. doi:10.1152/jn.00502.2012.
- Justice, J. B., Nicolaysen, L. C., and Michael, A. C. (1988). Modeling the dopaminergic nerve terminal. *J. Neurosci. Methods* 22, 239–252. doi:10.1016/0165-0270(88)90045-3.
- King, R., Barchas, J. D., and Huberman, B. A. (1984). Chaotic behavior in dopamine neurodynamics. *Proc. Natl. Acad. Sci.* 81, 1244–1247. doi:10.1073/pnas.81.4.1244.
- Porenta, G., and Riederer, P. (1982). A Mathematical Model of the Dopaminergic Synapse: Stability and Sensitivity Analyses, and Simulation of Parkinson's Disease and Aging Processes. *Cybern. Syst.* 13, 257–274. doi:10.1080/01969728208927705.
- Qi, Z., Miller, G., and Voit, E. (2008a). A Mathematical Model of Presynaptic Dopamine Homeostasis: Implications for Schizophrenia. *Pharmacopsychiatry* 41, S89–S98. doi:10.1055/s-2008-1080936.
- Qi, Z., Miller, G. W., and Voit, E. O. (2008b). Computational Systems Analysis of Dopamine Metabolism. *PLoS One* 3, e2444. doi:10.1371/journal.pone.0002444.
- Reed, M. C., Best, J., and Nijhout, H. F. (2009). Passive and active stabilization of dopamine in the striatum. *Biosci. Hypotheses* 2, 240–244. doi:10.1016/j.bihy.2009.03.008.
- Reed, M. C., Nijhout, H. F., and Best, J. A. (2012). Mathematical Insights into the Effects of Levodopa. *Front. Integr. Neurosci.* 6, 1–24. doi:10.3389/fnint.2012.00021.
- Tello-Bravo, D. (2012). A Mathematical Model of Dopamine Neurotransmission. *ASU Libr.* Thesis. Available at: <https://repository.asu.edu/items/14832>.
