# Supplementary material for: Influence of Energy Deficiency on the Molecular Processes of Substantia Nigra Pars Compacta Cell for Understanding Parkinsonian Neurodegeneration: A Comprehensive Biophysical Computational Model
Source: bioRxiv or medRxiv preprint supplement (doi:10.1101/2020.02.18.950337), 2020-02-19
Supplement: Supplementary file [file media-3.pdf]

## Ion Channels

**Table-1:** Parameter values for ion-channel dynamics of SNc cell model (Francis et al., 2013).

| Constant                                 | Symbol              | Value                                                  | Units                    |
|------------------------------------------|---------------------|--------------------------------------------------------|--------------------------|
| Faraday's constant                       | $F$                 | 96485                                                  | $coulomb * mole^{-1}$    |
| SNc membrane capacitance                 | $C_{snc}$           | $9 \times 10^7$                                        | $pF * cm^{-2}$           |
| Cytosolic volume                         | $v_{cyt}$           | $\phi_{cyt} * v_{pmu}$                                 | $pl$                     |
| Fraction of cytosolic volume             | $\phi_{cyt}$        | 0.5                                                    | <i>dimensionless</i>     |
| Pacemaking unit (PMU) volume             | $v_{pmu}$           | 5                                                      | $pl$                     |
| PMU area                                 | $\mathcal{A}_{pmu}$ | $\mathcal{S}_{pmu} * v_{pmu}$                          | $cm^2$                   |
| PMU surface area-to-volume ratio         | $\mathcal{S}_{pmu}$ | $1.6667 \times 10^4$                                   | $cm^{-1}$                |
| Voltage defined thermodynamic entity     | $V_D$               | $\frac{V}{V_\tau}$                                     | <i>dimensionless</i>     |
| Temperature defined thermodynamic entity | $V_\tau$            | $\frac{R * T}{F}$                                      | $mV$                     |
| Universal gas constant                   | $R$                 | 8314.472                                               | $mJ * mol^{-1} * K^{-1}$ |
| Physiological temperature                | $T$                 | 310.15                                                 | $K$                      |
| Maximal conductance of calcium channel   | $\bar{g}_{Ca,L}$    | 2101.2                                                 | $pA * mM^{-1}$           |
| Extracellular calcium concentration      | $[Ca_e]$            | 1.8                                                    | $mM$                     |
| Reversal potential for calcium ion       | $V_{Ca}$            | $\frac{1}{2} * \log\left(\frac{[Ca_e]}{[Ca_i]}\right)$ | <i>dimensionless</i>     |
| Valence of calcium ion                   | $z_{Ca}$            | 2                                                      | <i>dimensionless</i>     |
| Maximal conductance of sodium channel    | $\bar{g}_{Na}$      | 907.68                                                 | $pA * mM^{-1}$           |
| Extracellular sodium concentration       | $[Na_e]$            | 137                                                    | $mM$                     |
| Reversal potential for sodium ion        | $V_{Na}$            | $\log\left(\frac{[Na_e]}{[Na_i]}\right)$               | <i>dimensionless</i>     |
| Valence of sodium ion                    | $z_{Na}$            | 1                                                      | <i>dimensionless</i>     |

|                                                             |                   |                                        |                      |
|-------------------------------------------------------------|-------------------|----------------------------------------|----------------------|
| Maximal conductance of sodium HCN channel                   | $\bar{g}_{NaHCN}$ | 51.1                                   | $pA * mM^{-1}$       |
| Maximal conductance of leaky sodium channel                 | $\bar{g}_{NaIk}$  | 0.0053                                 | $pA * mM^{-1}$       |
| Cyclic adenosine monophosphate concentration                | $[cAMP]$          | $1 \times 10^{-5}$                     | $mM$                 |
| Maximal conductance of delayed rectifying potassium channel | $\bar{g}_{Kdr}$   | 31.237                                 | $nS$                 |
| Extracellular potassium concentration                       | $[K_e]$           | 5.4                                    | $mM$                 |
| Reversal potential for potassium ion                        | $V_K$             | $\log\left(\frac{[K_e]}{[K_i]}\right)$ | <i>dimensionless</i> |
| Valence of potassium ion                                    | $z_K$             | 1                                      | <i>dimensionless</i> |
| Maximal conductance of inward rectifying potassium channel  | $\bar{g}_{Kir}$   | 13.816                                 | $nS$                 |
| Maximal conductance of small conductance potassium channel  | $\bar{g}_{Ksk}$   | 2.2515                                 | $pA * mM^{-1}$       |
| Maximal conductance for sodium-potassium ATPase             | $K_{nak}$         | 1085.7                                 | $pA$                 |
| Reaction rates of $I_{NaK}$                                 | $k_{2,nak}$       | 0.04                                   | $ms^{-1}$            |
|                                                             | $k_{3,nak}$       | 0.01                                   | $ms^{-1}$            |
|                                                             | $k_{4,nak}$       | 0.165                                  | $ms^{-1}$            |
| Dissociation constants of $I_{NaK}$                         | $K_{nak,nae}$     | 69.8                                   | $mM$                 |
|                                                             | $K_{nak,nai}$     | 4.05                                   | $mM$                 |
|                                                             | $K_{nak,ke}$      | 0.258                                  | $mM$                 |
|                                                             | $K_{nak,ki}$      | 32.88                                  | $mM$                 |
| Maximal conductance for calcium ATPase                      | $k_{pmca}$        | 2.233                                  | $pA * ms^{-1}$       |
| Reaction rates of $I_{pmca}$                                | $k_{2,pc}$        | 0.001                                  | $ms^{-1}$            |
|                                                             | $k_{3,pc}$        | 0.001                                  | $ms^{-1}$            |
|                                                             | $k_{4,pc}$        | 1                                      | $ms^{-1}$            |
| Dissociation constants of $I_{pmca}$                        | $K_{pc,e}$        | 2                                      | $mM$                 |

|                                                  |               |        |                      |
|--------------------------------------------------|---------------|--------|----------------------|
| Maximal conductance for sodium-calcium exchanger | $k_{xm}$      | 0.0166 | $pA * ms^{-1}$       |
| Energy barrier parameter of $I_{NaCaX}$          | $\delta_{xm}$ | 0.35   | <i>dimensionless</i> |
| Denominator factor of $I_{NaCaX}$                | $D_{xm}$      | 0.001  | <i>dimensionless</i> |

**Table-2:** Steady state values of ion-channel dynamics of SNc cell model (Francis et al., 2013).

| Symbol   | Value                    | Symbol      | Value  |
|----------|--------------------------|-------------|--------|
| $V$      | $-49.42 mV$              | $h_{Na}$    | 0.1848 |
| $[Ca_i]$ | $1.88 \times 10^{-4} mM$ | $O_{NaHCN}$ | 0.003  |
| $[Na_i]$ | $4.69 mM$                | $m_{K,dr}$  | 0.003  |
| $[K_i]$  | $126.06 mM$              | $y_{nak}$   | 0.6213 |
| $m_{Na}$ | 0.0952                   | $y_{pc}$    | 0.483  |

## Calcium Buffering Mechanisms

**Table-3:** Parameter values of calcium buffering mechanisms of SNc cell model (Francis et al., 2013; Marhl et al., 2000).

| Constant                                 | Symbol         | Value              | Units               |
|------------------------------------------|----------------|--------------------|---------------------|
| Calbindin reaction rates                 | $k_{1,calb}$   | 10                 | $mM^{-1} * ms^{-1}$ |
|                                          | $k_{2,calb}$   | $2 \times 10^{-3}$ | $ms^{-1}$           |
| Total cytosolic calbindin concentration  | $[Calb_{tot}]$ | 0.005              | $mM$                |
| Calmodulin reaction rates                | $k_{cam}^{cb}$ | 12000              | $mM^{-2} * ms^{-1}$ |
|                                          | $k_{cam}^{nb}$ | $3.7 \times 10^6$  | $mM^{-2} * ms^{-1}$ |
|                                          | $k_{cam}^{cd}$ | $3 \times 10^{-3}$ | $ms^{-1}$           |
|                                          | $k_{cam}^{nd}$ | 3                  | $ms^{-1}$           |
| Total cytosolic calmodulin concentration | $[Cam_{tot}]$  | 0.0235             | $mM$                |

|                                                                              |                |                       |                      |
|------------------------------------------------------------------------------|----------------|-----------------------|----------------------|
| The maximal rate constant of SERCA                                           | $k_{serca,er}$ | 0.02                  | $mM^{-1} * ms^{-1}$  |
| Maximal permeability of calcium channels in the ER membrane                  | $k_{ch,er}$    | 3                     | $ms^{-1}$            |
| Half saturation for calcium                                                  | $K_{ch,er}$    | 0.005                 | $mM$                 |
| Maximal rate constant for calcium leak flux through the ER membrane          | $k_{leak,er}$  | $5 \times 10^{-5}$    | $ms^{-1}$            |
| Ratio of free calcium to total calcium concentration in ER                   | $\beta_{er}$   | 0.0025                | <i>dimensionless</i> |
| Volume ratio between the ER and cytosol                                      | $\rho_{er}$    | 0.01                  | <i>dimensionless</i> |
| Maximal permeability of MCUs                                                 | $k_{mcu,mt}$   | $3 \times 10^{-4}$    | $mM * ms^{-1}$       |
| Half saturation for calcium                                                  | $K_{mcu,mt}$   | $8 \times 10^{-4}$    | $mM$                 |
| Maximal rate of calcium flux through $[Na^+]/[Ca^{2+}]$ exchangers and mPTPs | $k_{out,mt}$   | 0.125                 | $ms^{-1}$            |
| Half saturation for calcium                                                  | $K_{out,mt}$   | 0.005                 | $mM$                 |
| Maximal rate constant for calcium leak flux through the MT membrane          | $k_{leak,mt}$  | $6.25 \times 10^{-6}$ | $ms^{-1}$            |
| Ratio of free calcium to total calcium concentration in MT                   | $\beta_{mt}$   | 0.0025                | <i>dimensionless</i> |
| Volume ratio between the MT and cytosol                                      | $\rho_{mt}$    | 0.01                  | <i>dimensionless</i> |

**Table-4:** Steady state values of calcium buffering mechanisms of SNc cell model (Francis et al., 2013; Marhl et al., 2000).

| Symbol      | Value                 | Symbol   | Value                   |
|-------------|-----------------------|----------|-------------------------|
| $[Ca_{er}]$ | $1 \times 10^{-3} mM$ | $[Calb]$ | $26 \times 10^{-4} mM$  |
| $[Ca_{mt}]$ | $4 \times 10^{-4} mM$ | $[Cam]$  | $222 \times 10^{-4} mM$ |

## Energy Metabolism

**Table-5:** Parameter values of energy metabolism of SNc cell model (Cloutier and Wellstead, 2010, 2012).

| Constant                                   | Symbol             | Value                  | Units                |
|--------------------------------------------|--------------------|------------------------|----------------------|
| Extracellular glucose concentration        | $[GLC_e]$          | 1                      | $mM$                 |
| Hexokinase maximal flux                    | $\bar{v}_{hk}$     | $2.5 \times 10^{-3}$   | $mM * ms^{-1}$       |
| Affinity constant for ATP                  | $K_{m,ATP,hk}$     | 0.5                    | $mM$                 |
| Inhibition constant for F6P                | $K_{i,F6P}$        | 0.068                  | $mM$                 |
| Phosphofructokinase maximal flux           | $\bar{v}_{pfk}$    | $3.8 \times 10^{-3}$   | $mM * ms^{-1}$       |
| Affinity constant for F6P                  | $K_{m,F6P,pfk}$    | 0.18                   | $mM$                 |
| Affinity constant for ATP                  | $K_{m,ATP,pfk}$    | 0.05                   | $mM$                 |
| Affinity constant for F26P                 | $K_{m,F26P,pfk}$   | 0.01                   | $mM$                 |
| Activation constant for AMP                | $K_{a,AMP,pfk}$    | 0.05                   | $mM$                 |
| Inhibition constant for ATP                | $K_{i,ATP}$        | 1                      | $mM$                 |
| Coefficient constant for AMP               | $n_{AMP}$          | 0.5                    | <i>dimensionless</i> |
| Coefficient constant for ATP               | $n_{ATP}$          | 0.4                    | <i>dimensionless</i> |
| Total energy shuttles concentration        | $[ANP]$            | 2.51                   | $mM$                 |
| Coefficient constant for ADP               | $Q_{adk}$          | 0.92                   | <i>dimensionless</i> |
| Phosphofructokinase-2 maximal forward flux | $\bar{v}_{pfk2,f}$ | $2 \times 10^{-7}$     | $mM * ms^{-1}$       |
| Phosphofructokinase-2 maximal reverse flux | $\bar{v}_{pfk2,r}$ | $1.036 \times 10^{-7}$ | $mM * ms^{-1}$       |
| Affinity constant for F6P                  | $K_{m,F6P,pfk2}$   | 0.01                   | $mM$                 |
| Affinity constant for ATP                  | $K_{m,ATP,pfk2}$   | 0.05                   | $mM$                 |
| Affinity constant for F26P                 | $K_{m,F26P,pfk2}$  | 0.0001                 | $mM$                 |
| Activation constant for AMP                | $K_{a,AMP,pfk2}$   | 0.005                  | $mM$                 |
| Pyruvate kinase maximal flux               | $\bar{v}_{pk}$     | $5 \times 10^{-3}$     | $mM * ms^{-1}$       |
| Affinity constant for GAP                  | $K_{m,GAP,pk}$     | 0.4                    | $mM$                 |
| Affinity constant for ADP                  | $K_{m,ADP,pk}$     | 0.005                  | $mM$                 |

|                                                                          |                         |                         |                      |
|--------------------------------------------------------------------------|-------------------------|-------------------------|----------------------|
| Oxidative phosphorylation maximal flux                                   | $\bar{v}_{op}$          | $1 \times 10^{-3}$      | $mM * ms^{-1}$       |
| Maximal electron transport chain efficiency                              | $\bar{\eta}_{op}$       | 0.995                   | <i>dimensionless</i> |
| Maximal fraction of <i>asyn*</i> effect on the oxidative phosphorylation | $\beta_{op,asyn_{mis}}$ | 0.08                    | <i>dimensionless</i> |
| Affinity constant for <i>asyn*</i>                                       | $K_{asyn_{mis}}$        | $8.5 \times 10^{-3}$    | <i>mM</i>            |
| Affinity constant for PYR                                                | $K_{m,PYR,op}$          | 0.5                     | <i>mM</i>            |
| Affinity constant for ADP                                                | $K_{m,ADP,op}$          | 0.005                   | <i>mM</i>            |
| Forward reaction constant of LDH                                         | $k_{ldh,f}$             | $12.5 \times 10^{-3}$   | $ms^{-1}$            |
| Reverse reaction constant of LDH                                         | $k_{ldh,r}$             | $2.5355 \times 10^{-3}$ | $ms^{-1}$            |
| Maximal lactate fermentation efficiency                                  | $\bar{\eta}_{ldh}$      | 1                       | <i>dimensionless</i> |
| Maximal fraction of <i>ROS</i> effect on the lactate fermentation        | $\beta_{ldh,ROS}$       | 0.25                    | <i>dimensionless</i> |
| Affinity constant for <i>ROS</i>                                         | $K_{ldh,ROS}$           | $10 \times 10^{-3}$     | <i>mM</i>            |
| MCT maximal influx                                                       | $\bar{v}_{lac}$         | $3.55 \times 10^{-4}$   | $mM * ms^{-1}$       |
| Coefficient constant for MCT influx                                      | $K_{lac,inf}$           | 0.641                   | <i>dimensionless</i> |
| Reaction constant for lactate efflux                                     | $K_{lac,eff}$           | $7.1 \times 10^{-4}$    | $ms^{-1}$            |
| ATPase maximal flux                                                      | $\bar{v}_{ATPase}$      | $9.355 \times 10^{-4}$  | $mM * ms^{-1}$       |
| Affinity constant for ATP                                                | $K_{m,ATP}$             | 0.5                     | <i>mM</i>            |
| PPP maximal flux                                                         | $\bar{v}_{ppp}$         | $3.972 \times 10^{-4}$  | $mM * ms^{-1}$       |
| Inhibition constant for $\left(\frac{NADPH}{NADP}\right)$                | $K_{i,NADPH}$           | 20                      | <i>dimensionless</i> |
| Total NADPH and NADP concentration                                       | $[NADPH_{tot}]$         | 0.25                    | <i>mM</i>            |
| GR forward reaction constant                                             | $k_{gr,f}$              | $1.8 \times 10^{-4}$    | $mM^{-1} * ms^{-1}$  |
| GR reverse reaction constant                                             | $k_{gr,r}$              | $3.472 \times 10^{-7}$  | $mM^{-1} * ms^{-1}$  |
| Total GSH and GSSG concentration                                         | $[GSH_{tot}]$           | 2.5                     | <i>mM</i>            |
| Reaction constant of DOX                                                 | $K_{dox,ROS}$           | $7.5 \times 10^{-8}$    | $ms^{-1}$            |

|                                |               |                       |                     |
|--------------------------------|---------------|-----------------------|---------------------|
| CK forward reaction constant   | $k_{ck,f}$    | $3 \times 10^{-3}$    | $mM^{-1} * ms^{-1}$ |
| CK reverse reaction constant   | $k_{ck,r}$    | $1.26 \times 10^{-3}$ | $mM^{-1} * ms^{-1}$ |
| Total PCr and Cr concentration | $[PCr_{tot}]$ | 20                    | $mM$                |

**Table-6:** Steady state values of energy metabolism of SNc cell model (Cloutier and Wellstead, 2010, 2012).

| Symbol              | Value                    | Symbol  | Value    |
|---------------------|--------------------------|---------|----------|
| [F6P]               | 0.176 mM                 | [LAC]   | 0.598 mM |
| [F26P]              | $2.2 \times 10^{-3}$ mM  | [PCr]   | 18.04 mM |
| [GAP]               | $8.25 \times 10^{-2}$ mM | [NADPH] | 0.25 mM  |
| [PYR]               | 0.124 mM                 | [GSH]   | 2.5 mM   |
| [ATP <sub>i</sub> ] | 2.4 mM                   |         |          |

## Dopamine Turnover Processes

**Table-7:** Parameter values for DA turnover processes of SNc cell model (Reed et al., 2012; Tello-Bravo, 2012).

| Constant                                                | Symbol                    | Value              | Units                |
|---------------------------------------------------------|---------------------------|--------------------|----------------------|
| Average release flux per vesicle                        | $\psi$                    | 17.4391793         | $mM * ms^{-1}$       |
| Initial vesicular DA concentration                      | $DA_{v_o}$                | 500                | $mM$                 |
| Sensitivity to vesicular DA concentration               | $DA_{v_s}$                | 0.01               | $mM$                 |
| Affinity constant of DA binding to receptors            | $DA_{R_a}$                | $5 \times 10^{-5}$ | $mM$                 |
| Binding sensitivity                                     | $DA_{R_s}$                | 0.01               | $mM$                 |
| Activation constant for ATP                             | $K_{a,RRP}$               | 1.4286             | $mM$                 |
| Vesicle recycling maximal flux                          | $\bar{v}_{nrrp}$          | $1 \times 10^{-3}$ | $mM * ms^{-1}$       |
| Maximal vesicle recycling efficiency                    | $\bar{\eta}_{nrrp}$       | 0.995              | <i>dimensionless</i> |
| Maximal fraction of <i>asyn</i> * effect on the vesicle | $\beta_{nrrp,asyn_{mis}}$ | 0.08               | <i>dimensionless</i> |

|                                       |                  |                       |                      |
|---------------------------------------|------------------|-----------------------|----------------------|
| Affinity constant for $asyn^*$        | $K_{asyn_{mis}}$ | $8.5 \times 10^{-3}$  | $mM$                 |
| Reaction constant of $DA_e$ clearance | $k_{comt}$       | 0.0083511             | $ms^{-1}$            |
| Tyrosine concentration                | $[TYR]$          | $126 \times 10^{-3}$  | $mM$                 |
| Affinity constant for $TYR$           | $K_{TYR}$        | $46 \times 10^{-3}$   | $mM$                 |
| Inhibition constant for $DA_c$        | $K_{i,cda}$      | $11 \times 10^{-2}$   | $mM$                 |
| Inhibition constant for $DA_e$        | $K_{i,eda}$      | $46 \times 10^{-3}$   | $mM$                 |
| Maximal velocity of DA synthesis      | $\bar{V}_{synt}$ | $25 \times 10^{-6}$   | $mM * ms^{-1}$       |
| Affinity constant for $Ca_i$          | $K_{synt}$       | $35 \times 10^{-4}$   | $mM$                 |
| Maximal velocity of VMAT              | $\bar{V}_{cda}$  | $4.67 \times 10^{-6}$ | $ms^{-1}$            |
| Affinity constant for $DA_c$          | $K_{cda}$        | $238 \times 10^{-4}$  | $mM$                 |
| Scaling factor for VMAT               | $\alpha_{vmat}$  | $1 \times 10^{-3}$    | <i>dimensionless</i> |
| Scaling factor for $ATP_i$            | $\beta_{vmat}$   | 3                     | <i>dimensionless</i> |
| Reaction constant of $DA_c$ clearance | $k_{mao}$        | 0.00016               | $ms^{-1}$            |
| Maximal velocity of AADC              | $\bar{V}_{aadc}$ | $9.73 \times 10^{-5}$ | $mM * ms^{-1}$       |
| Affinity constant for $LDOPA$         | $K_{aadc}$       | 0.13                  | $mM$                 |
| Maximal velocity of AAT               | $\bar{V}_{aat}$  | $5.11 \times 10^{-7}$ | $mM * ms^{-1}$       |
| Affinity constant for $LDOPA_e$       | $K_{ldopa_e}$    | $3.2 \times 10^{-4}$  | $mM$                 |
| Affinity constant for $TYR_e$         | $K_{tyr_e}$      | $6.4 \times 10^{-4}$  | $mM$                 |
| Affinity constant for $TRP_e$         | $K_{trp_e}$      | $1.5 \times 10^{-4}$  | $mM$                 |
| Serum concentration of TYR            | $[TYR_e]$        | $6.3 \times 10^{-4}$  | $mM$                 |
| Serum concentration of TRP            | $[TRP_e]$        | $8.2 \times 10^{-4}$  | $mM$                 |
| Serum concentration of LDOPA          | $[sLD]$          | $3.6 \times 10^{-3}$  | $mM$                 |

**Table-8:** Steady state values of DA turnover processes of SNc cell model (Reed et al., 2012; Tello-Bravo, 2012).

| Symbol   | Value                 | Symbol    | Value                   |
|----------|-----------------------|-----------|-------------------------|
| $[DA_e]$ | $4 \times 10^{-6} mM$ | $[DA_v]$  | 500 $mM$                |
| $[DA_c]$ | $1 \times 10^{-4} mM$ | $[LDOPA]$ | $3.6 \times 10^{-4} mM$ |

## Molecular Pathways Involved in PD Pathology

**Table-9:** Parameter values of PD pathology pathways of SNc cell model (Cloutier and Wellstead, 2012).

| Constant                                                         | Symbol        | Value                  | Units                |
|------------------------------------------------------------------|---------------|------------------------|----------------------|
| Activation constant for ATP                                      | $K_{a,leak}$  | 0.5282                 | $mM$                 |
| Reaction constant for ROS production due to excess dopamine      | $k_{dopa}$    | $4.167 \times 10^{-4}$ | $mM^{-1} * ms^{-1}$  |
| Affinity constant for $[DA_c]$                                   | $K_{dopa}$    | 8.5                    | $mM$                 |
| Reaction constant for catalase                                   | $k_{cat}$     | $2.35 \times 10^{-5}$  | $ms^{-1}$            |
| Reaction constant for alpha-synuclein oxidation                  | $k_{syn}$     | $1.39 \times 10^{-8}$  | $mM * ms^{-1}$       |
| Reaction constant for alpha-synuclein consumption                | $k_{to}$      | $1.39 \times 10^{-7}$  | $ms^{-1}$            |
| Reaction constant for alpha-synuclein aggregation                | $k_{agg}$     | $2.08 \times 10^{-10}$ | $ms^{-1}$            |
| Affinity constant for $ASYN_{mis}$                               | $K_{agg}$     | $7.5 \times 10^{-3}$   | $mM$                 |
| Reaction constant for tagging of damaged protein                 | $k_{tag}$     | $7.64 \times 10^{-11}$ | $mM^{-1} * ms^{-1}$  |
| Total ubiquitin concentration                                    | $[Ub_{tot}]$  | $10.5 \times 10^{-3}$  | $mM$                 |
| Reaction constant for damaged protein disposal by the proteasome | $k_{prt}$     | $2.08 \times 10^{-10}$ | $ms^{-1}$            |
| Affinity constant for $ASYN_{agg}$                               | $K_{prt}$     | $5 \times 10^{-3}$     | $mM$                 |
| Fraction reduction of proteasome activity by $ASYN_{agg}$        | $\beta_{prt}$ | 0.25                   | <i>dimensionless</i> |
| Reaction constant for $ASYN_{agg}$ disposal by lysosome          | $k_{lyso}$    | $2.08 \times 10^{-11}$ | $ms^{-1}$            |
| Reaction constant for Lewy bodies from $ASYN_{agg}$              | $k_{lb}$      | $2.08 \times 10^{-11}$ | $ms^{-1}$            |
| Affinity constant for $ASYN_{agg}$                               | $K_{lb}$      | $5 \times 10^{-3}$     | $mM$                 |

**Table-10:** Steady state values of PD pathology pathways of SNc cell model (Cloutier and Wellstead, 2012).

| Symbol                 | Value                         | Symbol                 | Value                         |
|------------------------|-------------------------------|------------------------|-------------------------------|
| [ROS]                  | $1 \times 10^{-3} \text{ mM}$ | [ASYN <sub>tag</sub> ] | $1 \times 10^{-5} \text{ mM}$ |
| [ASYN]                 | 0.1 mM                        | [ASYN <sub>agg</sub> ] | 0 mM                          |
| [ASYN <sub>mis</sub> ] | $1 \times 10^{-3} \text{ mM}$ | [LB]                   | 0 mM                          |

## Apoptotic Pathways

**Table-11:** Parameter values of apoptotic pathways of SNe cell model (Hong et al., 2012).

| Constant                                                  | Symbol     | Value               | Units                             |
|-----------------------------------------------------------|------------|---------------------|-----------------------------------|
| Forward reaction constant for [Ca <sub>i</sub> . Calpain] | $k_1^+$    | 1                   | $\text{mM}^{-1} * \text{ms}^{-1}$ |
| Reverse reaction constant for [Ca <sub>i</sub> . Calpain] | $k_1^-$    | $1 \times 10^{-3}$  | $\text{ms}^{-1}$                  |
| Forward reaction constant for [Calpain*]                  | $k_2^+$    | $1 \times 10^{-3}$  | $\text{ms}^{-1}$                  |
| Forward reaction constant for [Calpain*. Casp12]          | $k_3^+$    | 1                   | $\text{mM}^{-1} * \text{ms}^{-1}$ |
| Reverse reaction constant for [Calpain*. Casp12]          | $k_3^-$    | $1 \times 10^{-3}$  | $\text{ms}^{-1}$                  |
| Forward reaction constant for [Casp12*]                   | $k_4^+$    | $1 \times 10^{-3}$  | $\text{ms}^{-1}$                  |
| Forward reaction constant for [Casp12*. Casp9]            | $k_5^+$    | 10                  | $\text{mM}^{-1} * \text{ms}^{-1}$ |
| Reverse reaction constant for [Casp12*. Casp9]            | $k_5^-$    | $5 \times 10^{-4}$  | $\text{ms}^{-1}$                  |
| Forward reaction constant for [Casp9*]                    | $k_6^+$    | $1 \times 10^{-3}$  | $\text{ms}^{-1}$                  |
| Forward reaction constant for [Casp9*. Casp3]             | $k_7^+$    | 10                  | $\text{mM}^{-1} * \text{ms}^{-1}$ |
| Reverse reaction constant for [Casp9*. Casp3]             | $k_7^-$    | $5 \times 10^{-4}$  | $\text{ms}^{-1}$                  |
| Forward reaction constant for [Casp3*]                    | $k_8^+$    | $1 \times 10^{-4}$  | $\text{ms}^{-1}$                  |
| Forward reaction constant for [Apop]                      | $k_9^+$    | 1                   | $\text{mM}^{-1} * \text{ms}^{-1}$ |
| Forward reaction constant for [Casp9*]                    | $k_{10}^+$ | $1 \times 10^{-3}$  | $\text{ms}^{-1}$                  |
| Forward reaction constant for [Casp9*. IAP]               | $k_{11}^+$ | 5                   | $\text{mM}^{-1} * \text{ms}^{-1}$ |
| Reverse reaction constant for [Casp9*. IAP]               | $k_{11}^-$ | $35 \times 10^{-7}$ | $\text{ms}^{-1}$                  |
| Forward reaction constant for [Casp3*. IAP]               | $k_{12}^+$ | 5                   | $\text{mM}^{-1} * \text{ms}^{-1}$ |
| Reverse reaction constant for [Casp3*. IAP]               | $k_{12}^-$ | $35 \times 10^{-7}$ | $\text{ms}^{-1}$                  |
| Forward reaction constant for [ROS <sub>mit</sub> ]       | $k_{13}^+$ | 0.5                 | $\text{mM}^{-1} * \text{ms}^{-1}$ |
| Forward reaction constant for [PTP <sub>mit</sub> *]      | $k_{14}^+$ | 0.5                 | $\text{mM}^{-1} * \text{ms}^{-1}$ |
| Forward reaction constant for [Cytc]                      | $k_{15}^+$ | 1                   | $\text{mM}^{-1} * \text{ms}^{-1}$ |
| Forward reaction constant for [Cytc. Casp9]               | $k_{16}^+$ | 1                   | $\text{mM}^{-1} * \text{ms}^{-1}$ |
| Reverse reaction constant for [Cytc. Casp9]               | $k_{16}^-$ | $1 \times 10^{-3}$  | $\text{ms}^{-1}$                  |

**Table-12:** Steady state values of energy metabolism of SNc cell model (Hong et al., 2012).

| Symbol                            | Value | Symbol                        | Value |
|-----------------------------------|-------|-------------------------------|-------|
| [ <i>Calpain</i> ]                | 1     | [ <i>ROS<sub>mit</sub></i> ]  | 0     |
| [ <i>Ca<sub>i</sub>.Calpain</i> ] | 0     | [ <i>PTP<sub>mit</sub>*</i> ] | 1     |
| [ <i>Calpain*</i> ]               | 0     | [ <i>Cytc<sub>mit</sub></i> ] | 1     |
| [ <i>Casp12</i> ]                 | 1     | [ <i>Cytc</i> ]               | 0     |
| [ <i>Calpain*.Casp12</i> ]        | 0     | [ <i>Cytc.Casp9</i> ]         | 0     |
| [ <i>Casp12*</i> ]                | 0     | [ <i>Casp9</i> ]              | 1     |
| [ <i>Casp12*.Casp9</i> ]          | 0     | [ <i>Casp9*</i> ]             | 0     |
| [ <i>Casp3</i> ]                  | 1     | [ <i>Casp9*.Casp3</i> ]       | 0     |
| [ <i>Casp3*</i> ]                 | 0     | [ <i>IAP</i> ]                | 1     |
| [ <i>Casp9*.IAP</i> ]             | 0     | [ <i>Casp3*.IAP</i> ]         | 0     |
| [ <i>Apop</i> ]                   | 0     |                               |       |

## Energy Consumption

**Table-13:** Parameters for energy consumption processes of SNc cell model.

| Constant                                                   | Symbol          | Value                  | Units                              |
|------------------------------------------------------------|-----------------|------------------------|------------------------------------|
| Faraday's constant                                         | $F$             | 96485                  | <i>coulomb * mole<sup>-1</sup></i> |
| Cytosolic volume                                           | $v_{cyt}$       | $\phi_{cyt} * v_{pmu}$ | <i>pl</i>                          |
| Pacemaking unit (PMU) volume                               | $v_{pmu}$       | 5                      | <i>pl</i>                          |
| Fraction of cytosolic volume                               | $\phi_{cyt}$    | 0.5                    | <i>dimensionless</i>               |
| Scaling factor for synaptic recycling                      | $\lambda_{sr}$  | 100                    | <i>dimensionless</i>               |
| Scaling factor for neurotransmitter packing                | $\lambda_{np}$  | 1                      | <i>dimensionless</i>               |
| Ratio of free calcium to total calcium concentration in ER | $\beta_{er}$    | 0.0025                 | <i>dimensionless</i>               |
| Volume ratio between the ER and cytosol                    | $\rho_{er}$     | 0.01                   | <i>dimensionless</i>               |
| Scaling factor for proteasome                              | $\lambda_{prt}$ | 25                     | <i>dimensionless</i>               |

|                                   |                  |    |                      |
|-----------------------------------|------------------|----|----------------------|
| Scaling factor for ubiquitination | $\lambda_{tag}$  | 3  | <i>dimensionless</i> |
| Scaling factor for lysosome       | $\lambda_{lyso}$ | 10 | <i>dimensionless</i> |

## References

- Cloutier, M., and Wellstead, P. (2010). The control systems structures of energy metabolism. *J. R. Soc. Interface* 7, 651–665. doi:10.1098/rsif.2009.0371.
- Cloutier, M., and Wellstead, P. (2012). Dynamic modelling of protein and oxidative metabolisms simulates the pathogenesis of Parkinson’s disease. *IET Syst. Biol.* 6, 65–72. doi:10.1049/iet-syb.2011.0075.
- Francis, F., García, M. R., and Middleton, R. H. (2013). A single compartment model of pacemaking in disassociated substantia nigra neurons: stability and energy analysis. *J. Comput. Neurosci.* 35, 295–316. doi:10.1007/s10827-013-0453-9.
- Hong, J.-Y., Kwon, S.-S., Kim, G.-H., Kim, J.-W., Sato, E., Cho, K.-H., et al. (2012). Computational modeling of apoptotic signaling pathways induced by cisplatin. *BMC Syst. Biol.* 6, 122. doi:10.1186/1752-0509-6-122.
- Marhl, M., Haberichter, T., Brumen, M., and Heinrich, R. (2000). Complex calcium oscillations and the role of mitochondria and cytosolic proteins. *BioSystems* 57, 75–86. doi:10.1016/S0303-2647(00)00090-3.
- Reed, M. C., Nijhout, H. F., and Best, J. A. (2012). Mathematical Insights into the Effects of Levodopa. *Front. Integr. Neurosci.* 6, 1–24. doi:10.3389/fnint.2012.00021.
- Tello-Bravo, D. (2012). A Mathematical Model of Dopamine Neurotransmission. *ASU Libr. Thesis*. Available at: <https://repository.asu.edu/items/14832>.
