# Supplementary material for: Influence of Energy Deficiency on the Molecular Processes of Substantia Nigra Pars Compacta Cell for Understanding Parkinsonian Neurodegeneration: A Comprehensive Biophysical Computational Model
Source: bioRxiv or medRxiv preprint supplement (doi:10.1101/2020.02.18.950337), 2020-02-19
Supplement: Supplementary file [file media-4.pdf]

# RECEPTOR MODELING

## AMPA/Kainate Receptors

The simplest model that approximates the kinetics of the fast AMPA/kainate type of glutamate receptors can be represented by the two-state diagram:

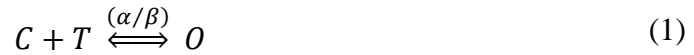

where,  $\alpha$  and  $\beta$  are voltage-independent forward and backward rate constants,  $C$  is the closed state of the receptor,  $O$  is the open state of the receptor, and  $T$  is the neurotransmitter. If  $r$  is defined as the fraction of the receptors in the open state, it is then described by the following first-order kinetic equation:

$$\frac{d(r)}{dt} = \alpha * [T] * (1 - r) - \beta * r \quad (2)$$

and the postsynaptic current ( $I_{AMPA}$ ) is given by,

$$I_{AMPA} = \bar{g}_{AMPA} * r * (V - E_{AMPA}) \quad (3)$$

where,  $\bar{g}_{AMPA}$  is the maximal conductance,  $E_{AMPA}$  is the reversal potential,  $V$  is the postsynaptic membrane potential,  $[T]$  is the neurotransmitter, and  $r$  is the fraction of the receptors in the open state.

## NMDA Receptors

The slower NMDA type of glutamate receptors can be represented with a two-state model similar to AMPA/kainate receptors, with a voltage-dependent term representing magnesium block. Using the scheme in Eqs. 1 and 2, the postsynaptic current is given by

$$I_{NMDA} = \bar{g}_{NMDA} * r * B(V) * (V - E_{NMDA}) \quad (4)$$

where,  $\bar{g}_{NMDA}$  is the maximal conductance,  $E_{NMDA}$  is the reversal potential,  $B(V)$  is the magnesium block,  $V$  is the postsynaptic membrane potential, and  $r$  is the fraction of the receptors in the open state.

$$B(V) = \frac{1}{1 + \left( \frac{[Mg^{2+}]}{3.57} * e^{-0.062 * V} \right)} \quad (5)$$

where,  $[Mg^{2+}]$  is the external magnesium concentration, and  $V$  is the postsynaptic membrane potential.

### **GABA<sub>A</sub> Receptors**

GABA<sub>A</sub> receptors can also be represented by the scheme in Eqs. 1 and 2, with the postsynaptic current given by

$$I_{GABA_A} = \bar{g}_{GABA_A} * r * (V - E_{GABA_A}) \quad (6)$$

where,  $\bar{g}_{GABA_A}$  is the maximal conductance,  $E_{GABA_A}$  is the reversal potential,  $V$  is the postsynaptic membrane potential, and  $r$  is the fraction of the receptors in the open state.

### **GABA<sub>B</sub> Receptors**

The stimulus dependency of GABA<sub>B</sub> responses, unfortunately, cannot be handled correctly by a two-state model. The simplest model of GABA<sub>B</sub>-mediated currents has two variables:

$$\frac{d(r)}{dt} = K_1 * [T] * (1 - r) - K_2 * r \quad (7)$$

$$\frac{d(s)}{dt} = K_3 * r - K_4 * s \quad (8)$$

and the postsynaptic current ( $I_{GABA_B}$ ) is given by,

$$I_{GABA_B} = \bar{g}_{GABA_B} * \frac{s^n}{s^n + K_d} * (V - E_{GABA_B}) \quad (9)$$

where,  $\bar{g}_{GABA_B}$  is the maximal conductance,  $E_{GABA_B}$  ( $= V_K$ ) is the reversal potential,  $V$  is the postsynaptic membrane potential,  $r$  is the fraction of the receptors in the open state,  $s$  is the fraction of activated G-proteins,  $K_d$  is the dissociation constant of the binding of  $s$  on the  $K^+$  channels,  $K_1$  and  $K_2$  are voltage-independent forward and backward rate constants for  $r$ ,  $K_3$

and  $K_4$  are voltage-independent forward and backward rate constants for  $s$ , and  $[T]$  is the neurotransmitter.

### Overall Synaptic Current

The overall synaptic input current flux ( $J_{syn}$ ) to SNc neuron is given by,

$$J_{syn} = -\frac{1}{F * v_{cyt}} * (I_{AMPA} + I_{NMDA} + I_{GABA_A} + I_{GABA_B}) \quad (10)$$

where,  $I_{AMPA}$  is the excitatory AMPA synaptic current,  $I_{NMDA}$  is the excitatory NMDA synaptic current,  $I_{GABA_A}$  is the inhibitory GABA<sub>A</sub> synaptic current,  $I_{GABA_B}$  is the inhibitory GABA<sub>B</sub> synaptic current,  $F$  is the Faraday's constant, and  $v_{cyt}$  is the cytosolic volume.

**Table-1:** Parameter values of receptor models

| Constant                                                                   | Symbol             | Value                  | Units                              |
|----------------------------------------------------------------------------|--------------------|------------------------|------------------------------------|
| Faraday's constant                                                         | $F$                | 96485                  | <i>coulomb * mole<sup>-1</sup></i> |
| Cytosolic volume                                                           | $v_{cyt}$          | $\phi_{cyt} * v_{pmu}$ | <i>pl</i>                          |
| Fraction of cytosolic volume                                               | $\phi_{cyt}$       | 0.5                    | <i>dimensionless</i>               |
| Pacemaking unit (PMU) volume                                               | $v_{pmu}$          | 5                      | <i>pl</i>                          |
| Maximal conductance of AMPA receptor                                       | $\bar{g}_{AMPA}$   | 0.35 – 1               | <i>nS</i>                          |
| Maximal conductance of NMDA receptor                                       | $\bar{g}_{NMDA}$   | 0.01 – 0.6             | <i>nS</i>                          |
| Concentration of Magnesium                                                 | $[Mg^{2+}]$        | 1 – 2                  | <i>mM</i>                          |
| Maximal conductance of GABA <sub>A</sub> receptor                          | $\bar{g}_{GABA_A}$ | 0.25 – 1.2             | <i>nS</i>                          |
| Maximal conductance of GABA <sub>B</sub> receptor                          | $\bar{g}_{GABA_B}$ | 0.06                   | <i>nS</i>                          |
| Dissociation constant of the binding of $s$ on the K <sup>+</sup> channels | $K_d$              | 100                    | $\mu M^4$                          |
| Voltage-independent forward rate constant for $r$ of GABA <sub>B</sub>     | $K_1$              | $9 \times 10^4$        | $M^{-1} * sec^{-1}$                |

|                                                                         |                   |                   |                      |
|-------------------------------------------------------------------------|-------------------|-------------------|----------------------|
| Voltage-independent backward rate constant for $r$ of GABA <sub>B</sub> | $K_2$             | 1.2               | $sec^{-1}$           |
| Voltage-independent forward rate constant for $s$ of GABA <sub>B</sub>  | $K_3$             | 180               | $sec^{-1}$           |
| Voltage-independent backward rate constant for $s$ of GABA <sub>B</sub> | $K_4$             | 34                | $sec^{-1}$           |
| Cooperativity constant (binding sites)                                  | $n$               | 4                 | <i>dimensionless</i> |
| Reversal potential of AMPA                                              | $E_{AMPA}$        | 0                 | <i>mV</i>            |
| Reversal potential of NMDA                                              | $E_{NMDA}$        | 0                 | <i>mV</i>            |
| Reversal potential of GABA <sub>A</sub>                                 | $E_{GABA_A}$      | -80               | <i>mV</i>            |
| Reversal potential of GABA <sub>B</sub>                                 | $E_{GABA_B}$      | -95               | <i>mV</i>            |
| Voltage-independent forward rate constant for $r$ ( $\alpha$ )          | AMPA              | $1.1 \times 10^6$ | $M^{-1} * sec^{-1}$  |
|                                                                         | NMDA              | $7.2 \times 10^4$ | $M^{-1} * sec^{-1}$  |
|                                                                         | GABA <sub>A</sub> | $5 \times 10^6$   | $M^{-1} * sec^{-1}$  |
| Voltage-independent backward rate constant for $r$ ( $\beta$ )          | AMPA              | 190               | $sec^{-1}$           |
|                                                                         | NMDA              | 6.6               | $sec^{-1}$           |
|                                                                         | GABA <sub>A</sub> | 180               | $sec^{-1}$           |
